# Supplementary material for: Examining the fundamental biology of a novel population of directly reprogrammed human neural precursor cells
Source: PubMed Central journal article supplement (PMC6567617; doi:10.1186/s13287-019-1255-4), 2019-06-13

Supplementary Figure 4

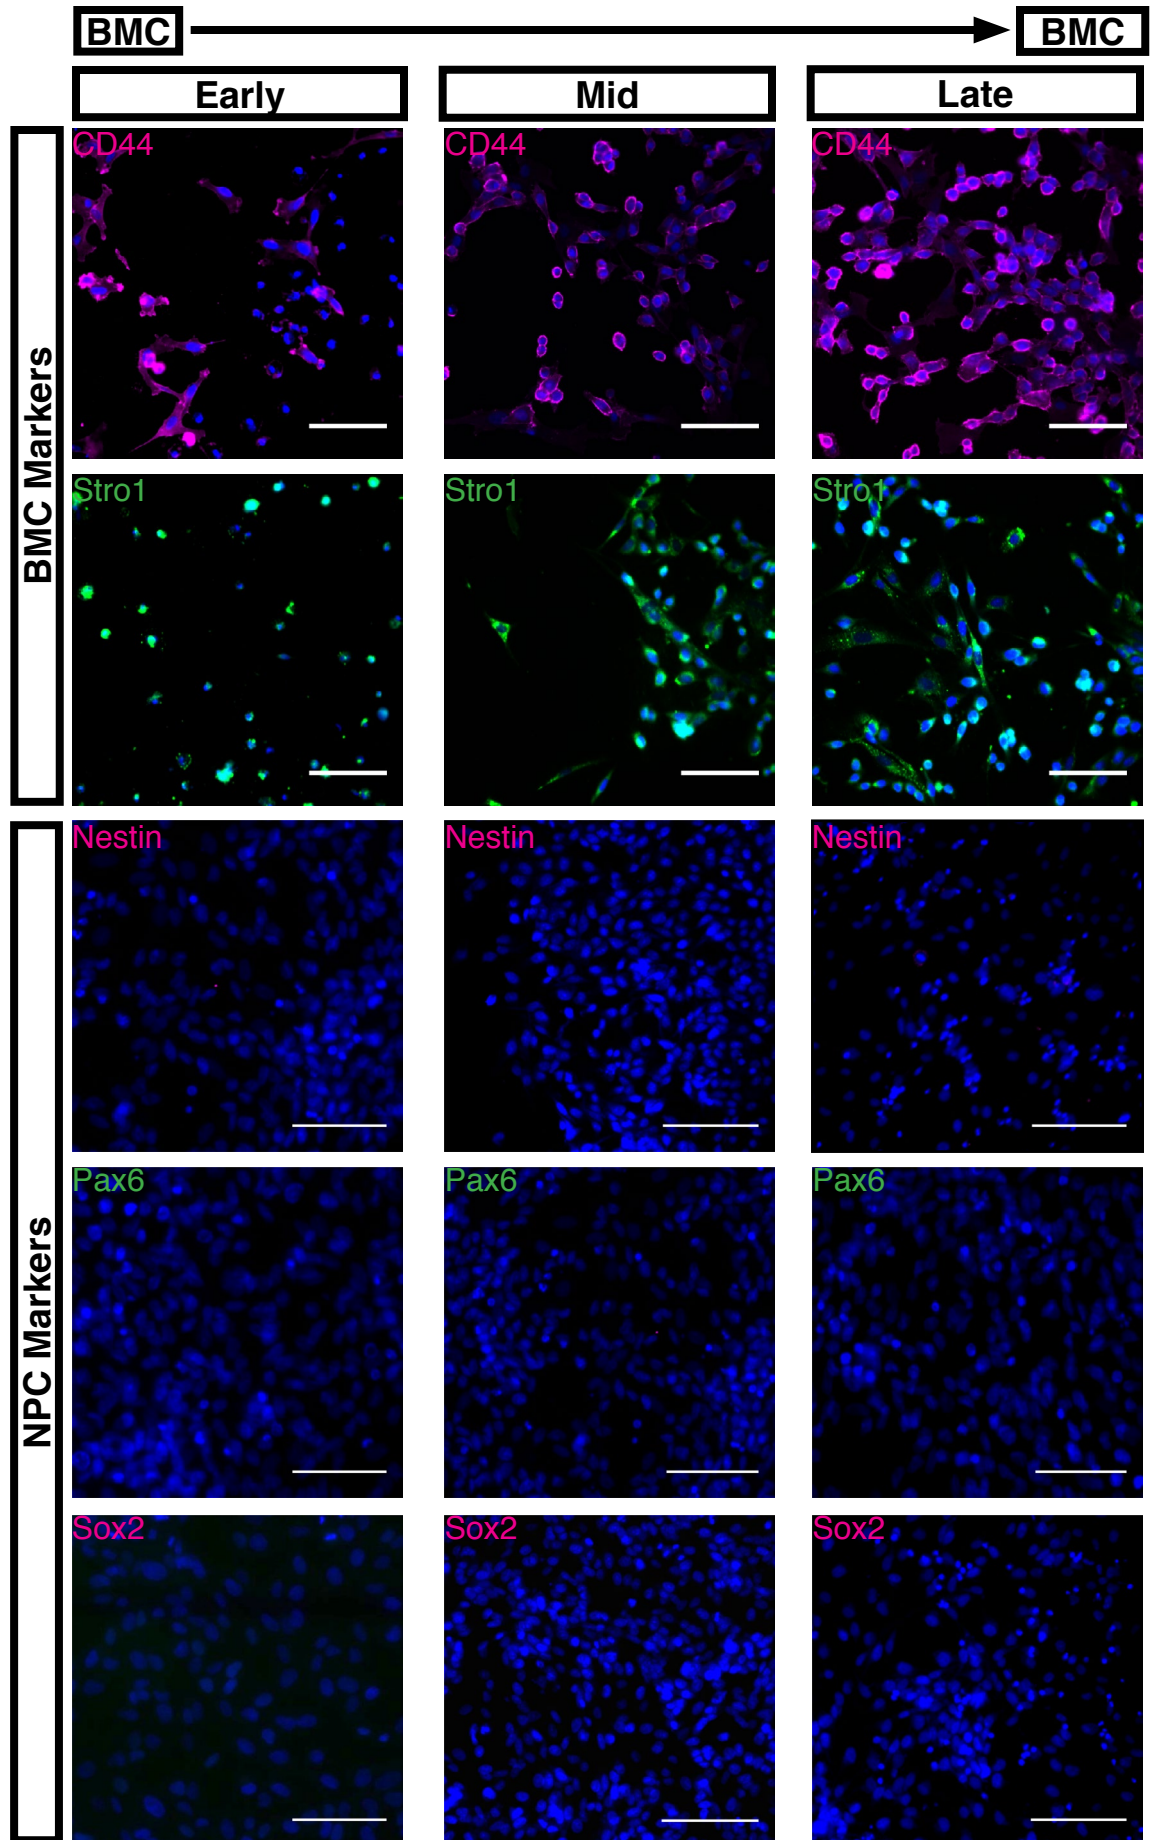

Supplement: 13287_2019_1255_MOESM4_ESM.pdf [file 13287_2019_1255_MOESM4_ESM.pdf]
