# Supplementary material for: Examining the fundamental biology of a novel population of directly reprogrammed human neural precursor cells
Source: PubMed Central journal article supplement (PMC6567617; doi:10.1186/s13287-019-1255-4), 2019-06-13
Supplement: 13287_2019_1255_MOESM8_ESM.pdf [file 13287_2019_1255_MOESM8_ESM.pdf]

# Supplementary Figure 8

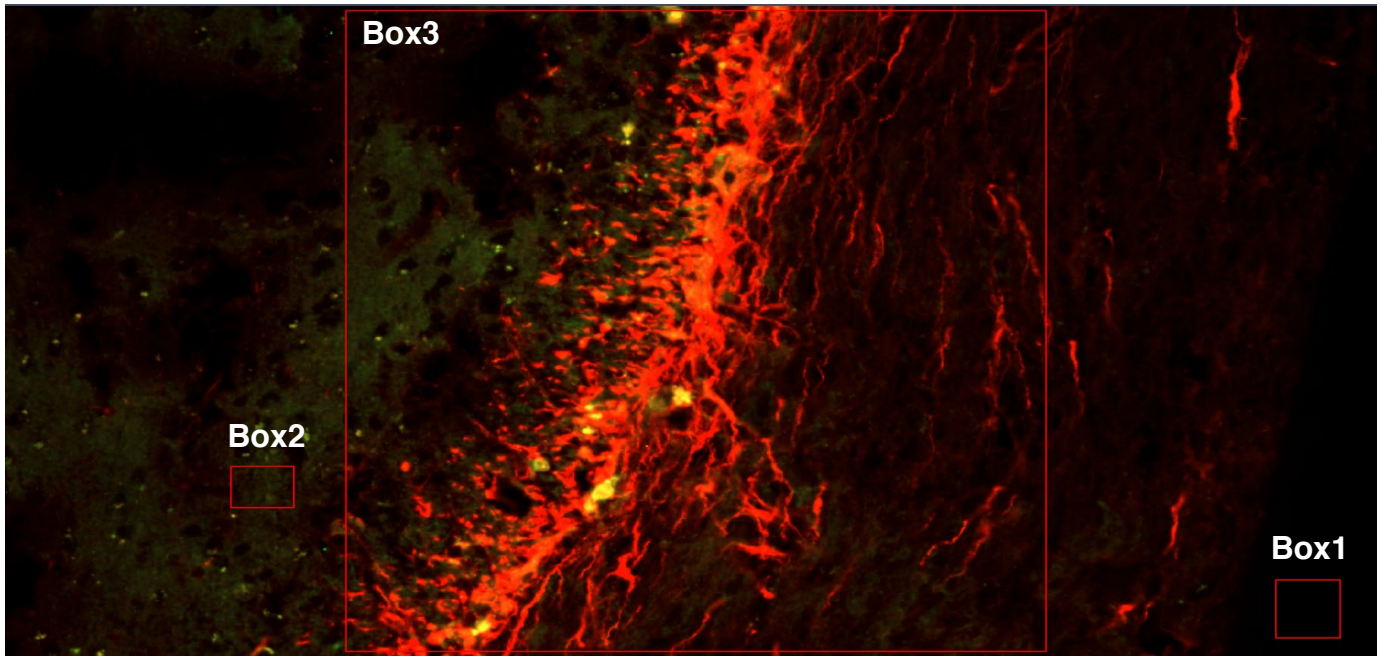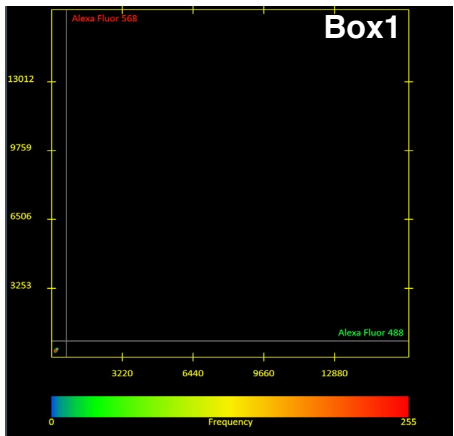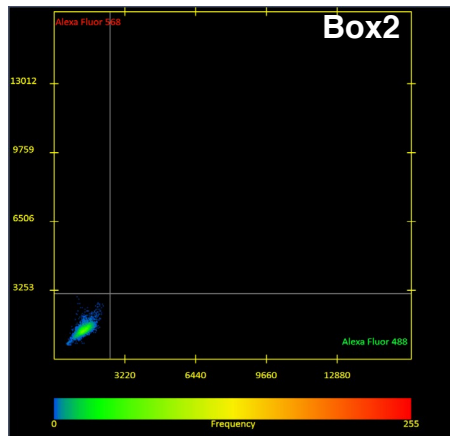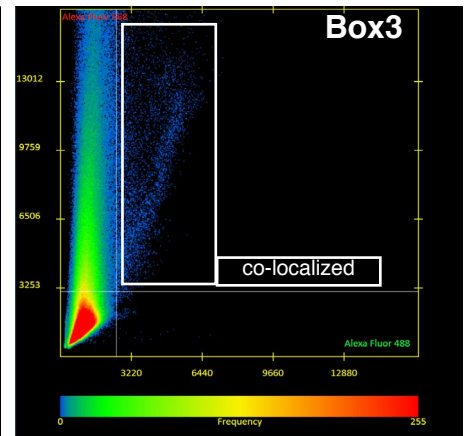

| Region      | Scatter...      | Pixel Count | Area( $\mu\text{m}^2$ ) | : Coloc Coeff... |
|-------------|-----------------|-------------|-------------------------|------------------|
| A           | B               | C           | D                       | I                |
| EntireImage | Alexa Fluor 488 | 573         | 29.52612                | --               |
| EntireImage | Alexa Fluor 568 | 213110      | 10981.34519             | --               |
| EntireImage | Colocalization  | 9338        | 481.1778                | 0.04198          |
| EntireImage | Background      | 1850579     | 95358.48529             | --               |
| EntireImage | Global          | 2073600     | 106850.5344             | 1                |
| 1 Rectangle | Alexa Fluor 488 | 0           | 0                       | --               |
| 1 Rectangle | Alexa Fluor 568 | 0           | 0                       | --               |
| 1 Rectangle | Colocalization  | 0           | 0                       | 0                |
| 1 Rectangle | Background      | 8827        | 454.84648               | --               |
| 1 Rectangle | Global          | 8827        | 454.84648               | 1                |
| 2 Rectangle | Alexa Fluor 488 | 0           | 0                       | --               |
| 2 Rectangle | Alexa Fluor 568 | 0           | 0                       | --               |
| 2 Rectangle | Colocalization  | 0           | 0                       | 0                |
| 2 Rectangle | Background      | 6230        | 321.02567               | --               |
| 2 Rectangle | Global          | 6230        | 321.02567               | 1                |
| 3 Rectangle | Alexa Fluor 488 | 214         | 11.02721                | --               |
| 3 Rectangle | Alexa Fluor 568 | 204998      | 10563.34194             | --               |
| 3 Rectangle | Colocalization  | 8553        | 440.72754               | 0.04005          |
| 3 Rectangle | Background      | 828870      | 42710.84223             | --               |
| 3 Rectangle | Global          | 1042635     | 53725.93892             | 1                |

Co-localization Coefficient

0

0

0.04005
